# Supplementary material for: Evaluation of a digital platform for osteoarthritis treatment: study protocol for a randomised clinical study
Source: PubMed Central journal article supplement — BMJ Open. 2018 Nov 8;8(11):e022925. doi: 10.1136/bmjopen-2018-022925 (PMC6231565; doi:10.1136/bmjopen-2018-022925), 2018-11-08
Supplement: bmjopen-2018-022925supp001.pdf [file bmjopen-2018-022925supp001.pdf]

| <b>Data category</b>                          | <b>Information</b>                                                                                                                                                                                                                                                                                                                                                                                                                                                                                                                                                                                                        |
|-----------------------------------------------|---------------------------------------------------------------------------------------------------------------------------------------------------------------------------------------------------------------------------------------------------------------------------------------------------------------------------------------------------------------------------------------------------------------------------------------------------------------------------------------------------------------------------------------------------------------------------------------------------------------------------|
| Primary registry and trial identifying number | Clinicaltrials.gov: NCT03328741                                                                                                                                                                                                                                                                                                                                                                                                                                                                                                                                                                                           |
| Date of registration in primary registry      | November 1 <sup>st</sup> , 2017                                                                                                                                                                                                                                                                                                                                                                                                                                                                                                                                                                                           |
| Secondary identifying numbers                 | N/A                                                                                                                                                                                                                                                                                                                                                                                                                                                                                                                                                                                                                       |
| Source(s) of monetary or material support     | Lund University, Sweden                                                                                                                                                                                                                                                                                                                                                                                                                                                                                                                                                                                                   |
| Primary sponsor                               | Lund University, Sweden                                                                                                                                                                                                                                                                                                                                                                                                                                                                                                                                                                                                   |
| Secondary sponsor(s)                          | The Swedish Rheumatism association, Stiftelsen för bistånd åt rörelsehindrade i Skåne and Sweden's innovation agency Vinnova                                                                                                                                                                                                                                                                                                                                                                                                                                                                                              |
| Contact for public queries                    | HN email address                                                                                                                                                                                                                                                                                                                                                                                                                                                                                                                                                                                                          |
| Contact for scientific queries                | HN email address                                                                                                                                                                                                                                                                                                                                                                                                                                                                                                                                                                                                          |
| Public title                                  | Evaluation of a Web-based Platform for Osteoarthritis Treatment                                                                                                                                                                                                                                                                                                                                                                                                                                                                                                                                                           |
| Scientific title                              | Evaluation of a Web-based Platform for Osteoarthritis Treatment                                                                                                                                                                                                                                                                                                                                                                                                                                                                                                                                                           |
| Countries of recruitment                      | Sweden. List of study sites can be obtained through HN email address                                                                                                                                                                                                                                                                                                                                                                                                                                                                                                                                                      |
| Health condition(s) or problem(s) studied     | Osteoarthritis (OA) of the knee joint                                                                                                                                                                                                                                                                                                                                                                                                                                                                                                                                                                                     |
| Intervention(s)                               | Web-based structured treatment program, Joint Academy                                                                                                                                                                                                                                                                                                                                                                                                                                                                                                                                                                     |
|                                               | Face-to-face structured treatment, the BOA program                                                                                                                                                                                                                                                                                                                                                                                                                                                                                                                                                                        |
| Key inclusion and exclusion criteria          | I. A clinical diagnosis of knee OA according to American College of Rheumatology (ACR) diagnostic criteria as well as national and international guidelines: knee pain and 3 of the following: > 50 years of age, morning stiffness >30 min, crepitus, bony tenderness, bony enlargement, no palpable warmth; II: Reported knee pain $\geq 4$ and $\leq 8$ on the NRS, and $\geq 6$ to $\leq 16$ in number of repetitions of the 30 second chair stand test, at pre-randomization screening. III. Able to handle a software program via smartphone, tablet or computer. III. Able to read and write the Swedish language. |
|                                               | Exclusion: I. Neurological disease, inflammatory joint disease or cancer. II. Cognitive disorder, e.g. dementia. III. Exercise is contra-indicated for the patient.                                                                                                                                                                                                                                                                                                                                                                                                                                                       |
| Study type                                    | Interventional                                                                                                                                                                                                                                                                                                                                                                                                                                                                                                                                                                                                            |
|                                               | Allocation: Randomized. Intervention model: Parallel assignment.                                                                                                                                                                                                                                                                                                                                                                                                                                                                                                                                                          |
|                                               | Masking: Non-blinded.                                                                                                                                                                                                                                                                                                                                                                                                                                                                                                                                                                                                     |
| Date of first enrolment                       | 22 <sup>nd</sup> of May, 2018                                                                                                                                                                                                                                                                                                                                                                                                                                                                                                                                                                                             |
| Target sample size                            | 270                                                                                                                                                                                                                                                                                                                                                                                                                                                                                                                                                                                                                       |
| Recruitment status                            | Recruiting                                                                                                                                                                                                                                                                                                                                                                                                                                                                                                                                                                                                                |
| Primary outcome(s)                            | Repetitions of the 30 second chair stand test                                                                                                                                                                                                                                                                                                                                                                                                                                                                                                                                                                             |

|                        |                                                                                                                                                                                      |
|------------------------|--------------------------------------------------------------------------------------------------------------------------------------------------------------------------------------|
| Key secondary outcomes | Knee joint pain, Health-related Quality of Life, Self-reported function, physical activity level, Patient Acceptable Symptom State, Absenteeism, Presenteeism and Health care costs. |
|------------------------|--------------------------------------------------------------------------------------------------------------------------------------------------------------------------------------|
